# Supplementary material for: Luminescence and thermal behaviors of free and trapped excitons in cesium lead halide perovskite nanosheets
Source: Royal Society of Chemistry journal article supplement (doi:10.1039/c8nr01109e), 2018-01-01
Supplement: c8nr01109e1.pdf [file c8nr01109e1.pdf]

## Supplementary Information

### Luminescence and Thermal Behaviors of Free and Trapped Excitons in Cesium Lead Halide Perovskite Nanosheets

Xiangzhou Lao,<sup>†</sup> Zhi Yang,<sup>‡</sup> Zhicheng Su,<sup>†</sup> Zilan Wang,<sup>§</sup> Honggang Ye,<sup>†,□</sup> Minqiang Wang,<sup>‡</sup> Xi Yao,<sup>‡</sup> and Shijie Xu<sup>\*†</sup>

<sup>†</sup>Department of Physics, and Shenzhen Institute of Research and Innovation (HKU-SIRI), The University of Hong Kong, Pokfulam Road, Hong Kong, China

<sup>‡</sup>Electronic Materials Research Laboratory (EMRL), Key Laboratory of Education Ministry; International Center for Dielectric Research (ICDR), Xi'an Jiaotong University, Xi'an 710049, China

<sup>§</sup>Tsinghua National Laboratory for Information Science and Technology, Department of Electronic Engineering, Tsinghua University, Beijing 100084, China

<sup>□</sup>Department of Applied Physics, Xi'an Jiaotong University, Xi'an 710049, China

\*E-mail: sjxu@hku.hk (S.J.X.)

The temperature-dependent linewidth broadening (solid squares) of the two peaks is plotted in Figure S1 and fitted using the equation<sup>S1,2</sup>

$$\Gamma(T) = \Gamma_0 + \Gamma_{ac}T + e^{\frac{\Gamma_{op}}{\hbar\omega_{op}/k_B T} - 1} \quad (1)$$

in which the first term  $\Gamma_0$  is the inhomogeneous broadening, while  $\Gamma_{ac}$  and  $\Gamma_{op}$  account for the contributions of exciton-acoustic phonon interaction and exciton-optical phonon, respectively, to the linewidth broadening. It should be noted that Eq. (1) is derived for the temperature-dependent linewidth broadening of luminescence of free excitons.<sup>S1</sup> As expected, the temperature dependence of luminescence linewidth of free excitons (e.g., Peak 2) can be represented with Eq. (1). The solid line in Figure S1(b) is a fitting curve with Eq. (1) for  $\hbar\omega_{op} = 34.4 \pm 0.8$  meV. This effective optical phonon energy is comparable to that (e.g.,  $29 \pm 3$  meV) of CsPbBr<sub>3</sub> obtained by Cho *et al.*<sup>S2</sup> For the temperature dependence of luminescence linewidth of trapped excitons in low temperature range of 10-60 K, acoustic phonon scattering may be dominant. We thus use the two former terms on the right hand side of Eq. (1) to make a fit. A fitting curve is depicted in solid linear line in Figure S1(a) for  $\Gamma_0 = 67.2 \pm 4.1$  meV and

$\Gamma_{ac}=0.8\pm0.1$  meV K<sup>-1</sup>. Clearly, inhomogeneous broadening due to broad defect state distribution makes a major contribution. These data tend to be consistent with the assignment of Peak 2 to free excitonic luminescence and Peak 1 to trapped excitonic one.

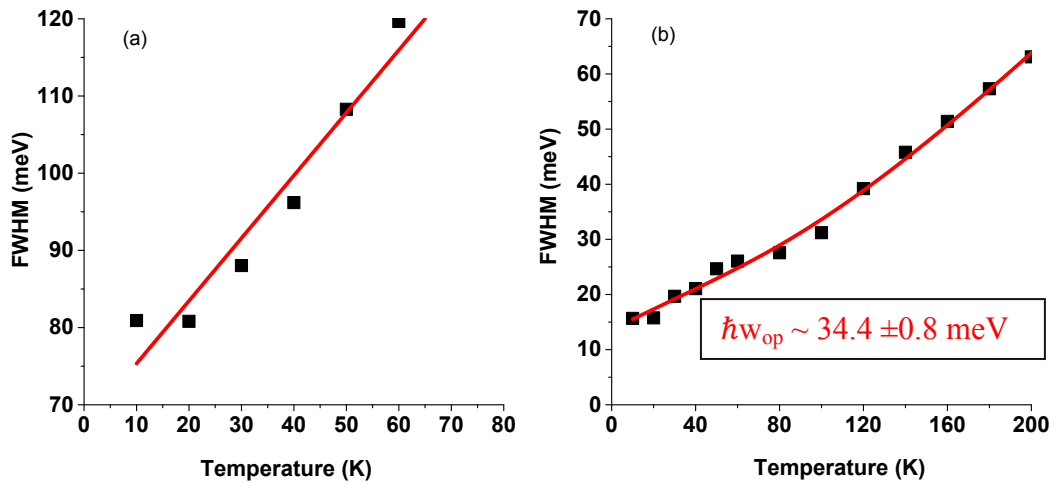

Figure S1 Linewidths vs. temperature for Peak 1 (a) and Peak 2 (b).

## References

S1 S. Rudin, T. L. Reinecke, B. Segall, *Phys. Rev. B* 1990, **42**, 11218-11231

S2 H. Cho, C. Wolf, J. S. Kim, H. J. Yun, J. S. Bae, H. Kim, J.-M. Heo, S. Ahn, T.-W. Lee, *Adv. Mater.* 2017, **29**, 1-8.
